# Supplementary material for: Myocardial Deformation Analysis in MYBPC3 and MYH7 Related Sarcomeric Hypertrophic Cardiomyopathy—The Graz Hypertrophic Cardiomyopathy Registry
Source: MDPI journal article supplement (doi:10.3390/genes12101469), 2021-09-23
Supplement: s1 [file s1]

**Table S1:** Truncating pathogenic or likely pathogenic *MYBPC3* (NM\_000256.3) mutations.

| Nucleotide Variant | Amino Acid Variant    | Mutation Type | Sex           | N <sup>1</sup> |
|--------------------|-----------------------|---------------|---------------|----------------|
| c.2864_2865del     | p.(Pro955ArgfsTer95)  | Frameshift    | F, M, M       | 3              |
| c.2864_2865del     | p.(Pro955ArgfsTer95)  | Frameshift    | M             | 1              |
| c.1574_1580del     | p.(Tyr525CysfsTer28)  | Frameshift    | M*            | 1              |
| c.3302del          | p.(Thr1101LysfsTer88) | Frameshift    | M             | 1              |
| c.2541C>A          | p.(Tyr847Ter)         | Nonsense      | F             | 1              |
| c.3767_3769del     | p.(Thr1256del)        | Deletion      | M             | 1              |
| c.927-9G>A         | NA                    | Splice        | M             | 1              |
| c.772G>A           | p.(Glu258Lys)         | Splice        | M             | 1              |
| c.772G>A           | p.(Glu258Lys)         | Splice        | M             | 1              |
| c.772G>A           | p.(Glu258Lys)         | Splice        | F             | 1              |
| c.772G>A           | p.(Glu258Lys)         | Splice        | M, M          | 2              |
| c.772G>A           | p.(Glu258Lys)         | Splice        | M             | 1              |
| c.26-2A>G          | NA                    | Splice        | F, F, F, F, F | 5              |
| c.26-2A>G          | NA                    | Splice        | F             | 1              |
| c.26-2A>G          | NA                    | Splice        | M             | 1              |
| c.26-2A>G          | NA                    | Splice        | M             | 1              |
| c.26-2A>G          | NA                    | Splice        | M             | 1              |
| c.927-10C>A        | NA                    | Splice        | M, F          | 2              |
| c.821+1G>A         | NA                    | Splice        | M             | 1              |
| c.821+1G>A         | NA                    | Splice        | F             | 1              |
| c.821+1G>A         | NA                    | Splice        | F             | 1              |
| c.821+1G>A         | NA                    | Splice        | F             | 1              |
| c.821+1G>A         | NA                    | Splice        | M             | 1              |
| c.1351+2T>C        | NA                    | Splice        | M             | 1              |
| c.505+1G>A         | NA                    | Splice        | M             | 1              |
| c.3190+5G>A        | NA                    | Splice        | F             | 1              |
| c.1227-13G>A       | NA                    | Splice        | M             | 1              |

<sup>1</sup> Number of affected family members. \* Patient with two mutations in *MYBPC3* (see Table A2) Abbreviations: NA, not available; M, male; F, female.

**Table S2:** Pathogenic or likely pathogenic *MYBPC3* (NM\_000256.3) missense mutations.

| Nucleotide Variant | Amino Acid Variant | Sex | N <sup>1</sup> |
|--------------------|--------------------|-----|----------------|
| c.1468G>A          | p.(Gly490Arg)      | M*  | 1              |
| c.2449C>T          | p.(Arg817Trp)      | F   | 1              |
| c.2449C>T          | p.(Arg817Trp)      | M   | 1              |
| c.3373G>A          | p.(Val1125Met)     | F   | 1              |
| c.1484G>A          | p.(Arg495Gln)      | M   | 1              |

<sup>1</sup> Number of affected family members. \* Patient with two mutations in *MYBPC3* (see Table A1). Abbreviations: M, male; F, female.

**Table S3:** Pathogenic or likely pathogenic *MYH7* (NM\_000257.4) mutations.

| <b>Nucleotide Variant</b> | <b>Amino Acid Variant</b> | <b>Mutation Type</b> | <b>Sex</b> | <b>N<sup>1</sup></b> |
|---------------------------|---------------------------|----------------------|------------|----------------------|
| c.697G>A                  | p.(Ala233Thr)             | Missense             | M, F       | 2                    |
| c.697G>A                  | p.(Ala233Thr)             | Missense             | F          | 1                    |
| c.1816G>A                 | p.(Val606Met)             | Missense             | F, F       | 2                    |
| c.2004C>G                 | p.(His668Gln)             | Missense             | M          | 1                    |
| c.1331A>C                 | p.(Asn444Thr)             | Missense             | F          | 1                    |
| c.1207C>T                 | p.(Arg403Trp)             | Missense             | F          | 1                    |
| c.1063G>A                 | p.(Ala355Thr)             | Missense             | F          | 1                    |
| c.2606G>A                 | p.(Arg869His)             | Missense             | M          | 1                    |
| c.2602G>C                 | p.(Ala868Pro)             | Missense             | F          | 1                    |
| c.2218A>G                 | p.(Lys740Glu)             | Missense             | F          | 1                    |
| c.2218A>G                 | p.(Lys740Glu)             | Missense             | M          | 1                    |
| c.2167C>G                 | p.(Arg723Gly)             | Missense             | F          | 1                    |
| c.732+1G>A                | p.?                       | Splicing             | M          | 1                    |
| c.2539_2541del            | p.(Lys847del)             | Small deletion       | M          | 1                    |
| NA                        | NA                        | NA                   | F, F       | 2                    |

<sup>1</sup> Number of affected family members. Abbreviations: NA, not available; M, male; F, female.
